# Supplementary material for: Gephyrin phosphorylation facilitates sexually dimorphic development and function of parvalbumin interneurons in the mouse hippocampus
Source: PubMed Central journal article supplement (PMC11412903; doi:10.1038/s41380-024-02517-5), 2024-03-19
Supplement: 41380_2024_2517_MOESM1_ESM.pdf [file 41380_2024_2517_MOESM1_ESM.pdf]

## Supplementary figure legends

**Supplemental Figure 1. Gephyrin phosphorylation is regulated between adult male and female mice but not during the estrus cycle.** **A)** Immunoblot of total gephyrin and phosphorylated gephyrin at S268 and S270 from hippocampal lysates of adult male and female WT mice. **B)** Immunoblotting of total ( $F(3, 20)=0.7907, p=0.5133$ ) or phospho-S268 ( $F(3, 20)=0.7351, p=0.5433$ ) and phospho-S270 ( $F(3, 20)=0.4006, p=0.7541$ ) at different estrous stages. **Statistics:** each data represents lysates from individual mice,  $n=4-6$  per group. Phospho-gephyrin levels are represented relative to total gephyrin. Panel A: two-way t-test; panel B: – One-way ANOVA with post-test comparing all groups. \*\*  $p<0.01$ . Bars, mean  $\pm$  SD.

**Figure 2 Supplement. Characterization of *Gphn*<sup>S268A/S270A</sup> mice.** **A)** Schematic of *Gphn*<sup>S268A/S270A</sup> constitutive phospho-null mice. **B)** No difference in the genotype ratio of mice born to heterozygous (het) parents in both males ( $Chi^2=0.200, p=0.9048$ ), females ( $Chi^2=0.000, p=1.000$ ), or pooled across sex ( $Chi^2=0.125, p=0.9394$ ) from 11 litters, 6-10 pups/litter. **C)** No genotype difference in body weight in males ( $F=0.8646, p=0.4271$ ) or females ( $F=2.147, p=0.1387$ ), or brain weight in males ( $F=1.067, p=0.4015$ ) or females ( $F=2.473, p=0.1141$ ) from 3-24 mice per group. **D)** Immunoblot of total gephyrin protein in *Gphn*<sup>S268A/S270A</sup> male ( $F(2, 18)=4.421, p=0.0274$ ) and female ( $F(2, 6)=6.393, p=0.0326$ ) hippocampi compared to WT (2-7 mice/group). **E)** Density of CB1+ basket cell terminals in the stratum pyramidale (*Interaction:*  $F(1,24)=2.265, p=0.1454$ ; *genotype:*  $F(1,24)=0.8427, p=0.3678$ ; *sex:*  $F(1,24)=0.5453, p=0.4674$ ) from 5-8 mice/group. **F)** Somatostatin (SST+) soma density in the CA1 hippocampal stratum oriens (S.O.) (*Interaction:*  $F(1,23)=0.5027, p=0.4854$ ; *genotype:*  $F(1,23)=0.6938, p=0.4134$ ; *sex:*  $F(1,23)=2.906, p=0.1017$ ) and stratum pyramidale (S.P.) (*Interaction:*  $F(1,23)=0.08147, p=0.7779$ ; *genotype:*  $F(1,23)=0.3323, p=0.5699$ ; *sex:*  $F(1,23)=2.813, p=0.1071$ ). **G)** Syt2+ puncta density in the stratum oriens (*Interaction:*  $F(1,19)=2.069, p=0.1666$ ; *genotype:*  $F(1,19)=0.5577, p=0.4643$ ; *sex:*  $F(1,19)=0.9459, p=0.3430$ ). Data represent averages across 6-10 sections per individual, 5-8 mice per group. **Statistics:** Panel B – Chi-squared test; Panels C+D: One-way ANOVA with post-test comparing all groups; Panels E, F: Two-way ANOVA with Sidak post-tests. \*  $p<0.05$ . Bars, mean  $\pm$  SD.

**Figure 3 Supplement. Gephyrin phosphorylation regulation of PV neuron electrophysiological properties.** Male and female WT and *Gphn*<sup>S268A/S270A</sup> mice were crossed to PV-Cre: Ai14-tdT to label PV neurons with tdTomato to identify PV neurons for patch clamp electrophysiology. **A)** No differences in PV neuron capacitance (*Interaction:*  $F(1,64)=2.251, p=0.1385$ ; *genotype:*  $F(1,64)=0.09933, p=0.7537$ ; *sex:*

$F(1,64)=0.2014$ ,  $p=0.6551$ ), **B**) action potential amplitude (*Interaction*:  $F(1,77)=0.4608$ ,  $p=0.4993$ ; *genotype*:  $F(1,77)=0.6135$ ,  $p=0.4359$ ; *sex*:  $F(1,77)=0.1195$ ,  $p=0.7305$ ), **C**) action potential half width (*Interaction*:  $F(1,77)=0.09472$ ,  $p=0.7591$ ; *genotype*:  $F(1,77)=0.02846$ ,  $p=0.8665$ ; *sex*:  $F(1,77)=0.8681$ ,  $p=0.3546$ ), and **D**) action potential attenuation (*Interaction*:  $F(1,75)=0.5657$ ,  $p=0.4543$ ; *genotype*:  $F(1,75)=2.013$ ,  $p=0.1601$ ; *sex*:  $F(1,75)=0.06807$ ,  $p=0.7949$ ). **E**) Maximum PV firing frequency by stimulation intensity (pA). **Statistics**: All panels: data represent recordings from 17-24 cells/3-4 mice per group; Panels A-D: two-way ANOVA with Sidak post-tests. Bars, mean  $\pm$  SD.

**Figure 4 Supplement. Extended behavioral analysis of WT and  $Gphn^{S268A/S270A}$  male and female mice. A)** Object location test: mice were given spatial cues in the arena while exploring two objects, one of which was moved to the opposite corner 24 hours later. Time to criterion (*Interaction*:  $F(1,36)=0.5267$ ,  $p=0.4727$ ; *sex*:  $F(1,36)=1.319$ ,  $p=0.2584$ ; *genotype*  $F(1,36)=0.1900$ ,  $p=0.6655$ ); 5 minute exploration time (*Interaction*:  $F(1,41)=0.01305$ ,  $p=0.9096$ ; *sex*:  $F(1,41)=0.05383$ ,  $p=0.8177$ ; *genotype*  $F(1,41)=0.9184$ ,  $p=0.3435$ ); discrimination index (*Interaction*:  $F(1,37)=0.6305$ ,  $p=0.4322$ ; *sex*:  $F(1,37)=0.2441$ ,  $p=0.6242$ ; *genotype*  $F(1,37)=1.516$ ,  $p=0.2259$ ). **B**) Elevated plus maze: time in open arms (*Interaction*:  $F(1,25)=0.001773$ ,  $p=0.9668$ ; *sex*:  $F(1,25)=0.8125$ ,  $p=0.3760$ ; *genotype*  $F(1,25)=0.1589$ ,  $p=0.6935$ ); time in closed arms (*Interaction*:  $F(1,25)=0.004003$ ,  $p=0.9501$ ; *sex*:  $F(1,25)=0.5176$ ,  $p=0.4785$ ; *genotype*  $F(1,25)=0.3010$ ,  $p=0.5882$ ), and time spent in the center (*Interaction*:  $F(1,25)=0.03282$ ,  $p=0.8577$ ; *sex*:  $F(1,25)=0.1115$ ,  $p=0.7413$ ; *genotype*  $F(1,25)=0.3698$ ,  $p=0.5486$ ) from  $n=5-8$  mice/group. **C**) Mice were monitored in a 15-minute open field test to measure total distance moved (*Interaction*:  $F(1,34)=0.4222$ ,  $p=0.5202$ ; *sex*:  $F(1,34)=3.920$ ,  $p=0.0558$ ; *genotype*  $F(1,34)=0.08455$ ,  $p=0.7730$ ), center time (*Interaction*:  $F(1,36)=0.4489$ ,  $p=0.5072$ ; *sex*:  $F(1,36)=11.69$ ,  $p=0.0016$ ; *genotype*  $F(1,36)=0.8482$ ,  $p=0.3634$ ), and average speed (*Interaction*:  $F(1,34)=0.3784$ ,  $p=0.5426$ ; *sex*:  $F(1,34)=0.1529$ ,  $p=0.6982$ ; *genotype*  $F(1,34)=3.554$ ,  $p=0.0680$ ) from  $n=7-11$  mice/group. **D**) Male and female mouse freezing during learning trials (T) 1-5 of the contextual fear memory test. Data represent individual mice,  $n=5-13$  per group. **Statistics**: Panels A - D – two-way ANOVA with Sidak post-tests \*  $p<0.05$ . Bars, mean  $\pm$  SD.

**Figure 5 Supplement. No sex differences in SST hippocampal neuron density.** Male and female WT and  $Gphn^{S268A/S270A}$  mice were crossed to Nkx2.1-Cre: Ai14-tdT to label putative hippocampal PV neurons with tdTomato at p7. **A**) tdT+/SST+ cell density within CA1 stratum oriens (*Interaction*:  $F(1,18)=0.1939$ ,  $p=0.6650$ ; *genotype*:  $F(1,18)=0.2036$ ,  $p=0.6572$ ; *sex*:  $F(1,18)=0.6427$ ,  $p=0.4332$ ) and stratum pyramidale (*Interaction*:  $F(1,19)=0.7321$ ,  $p=0.4029$ ; *genotype*:  $F(1,19)=0.6181$ ,  $p=0.4414$ ; *sex*:  $F(1,19)=0.2385$ ,

$p=0.6309$ ). Data represent individual averages across 6-12 sections. **Statistics:** Two-way ANOVA with Sidak post-tests. Bars, mean  $\pm$  SD.

**Figure 6 Supplement. Extended electrophysiological analysis of putative PV interneurons at p4 and hippocampal cFOS expression.** Male and female WT and *Gphn*<sup>S268A/S270A</sup> mice were crossed to Nkx2.1-Cre: Ai14-tdT to label putative hippocampal PV neurons with tdTomato at p4 for patch-sequencing of dorsal CA1 pyramidal layer interneurons. **A)** tdt+ neuron resting membrane potential (*Interaction:*  $F(1,81)=0.2004$ ,  $p=0.6556$ ; *sex:*  $F(1,81)=0.06568$ ,  $p=0.7984$ ; *genotype:*  $F(1,81)=0.5556$ ,  $p=0.4582$ ), **B)** Input resistance (*Interaction:*  $F(1,66)=0.4758$ ,  $p=0.4928$ ; *sex:*  $F(1,66)=0.9609$ ,  $p=0.3305$ ; *genotype:*  $F(1,66)=0.7460$ ,  $p=0.3903$ ), **C)** Capacitance (*Interaction:*  $F(1,71)=0.7696$ ,  $p=0.3833$ ; *sex:*  $F(1,71)=0.004031$ ,  $p=0.9496$ ; *genotype:*  $F(1,71)=0.05872$ ,  $p=0.8092$ ), **D)** Action potential half width (*Interaction:*  $F(1,61)=2.967$ ,  $p=0.0900$ ; *sex:*  $F(1,61)=0.1275$ ,  $p=0.7223$ ; *genotype:*  $F(1,61)=0.1907$ ,  $p=0.6639$ ) and **E)** attenuation (*Interaction:*  $F(1,59)=0.0230$ ,  $p=0.8872$ ; *sex:*  $F(1,59)=1.621$ ,  $p=0.208$ ; *genotype:*  $F(1,59)=4.464$ ,  $p=0.0389$ ). **F)** cFOS+ cell density in the hippocampal CA1 at p4 (*Interaction:*  $F(1,12)=8.525$ ,  $p=0.0128$ ; *sex:*  $F(1,12)=6.256$ ,  $p=0.0279$ ; *genotype:*  $F(1,12)=6.064$ ,  $p=0.0299$ ). **Statistics:** Panels A-E: data represent individual cells - WT male n=22 cells from 8 pups, WT female n=15 cells from 7 pups, *Gphn*<sup>S268A/S270A</sup> male n=5 cells from 9 pups, *Gphn*<sup>S268A/S270A</sup> female n=15 cells from 10 pups. Panel F: Data represent individual averages (6-8 sections/mouse, n=4 mice per group). All panels: Two-way ANOVA with Sidak post-tests. Bars, mean  $\pm$  SD.

**A**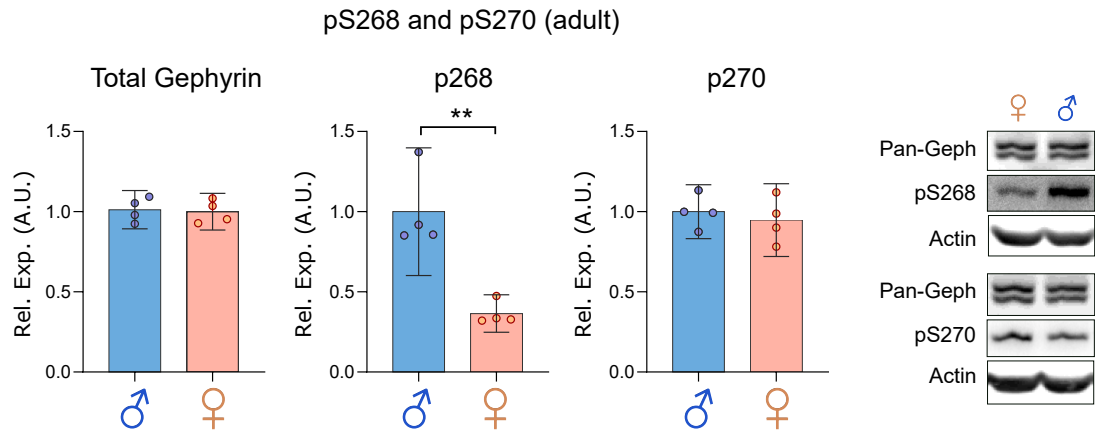**B**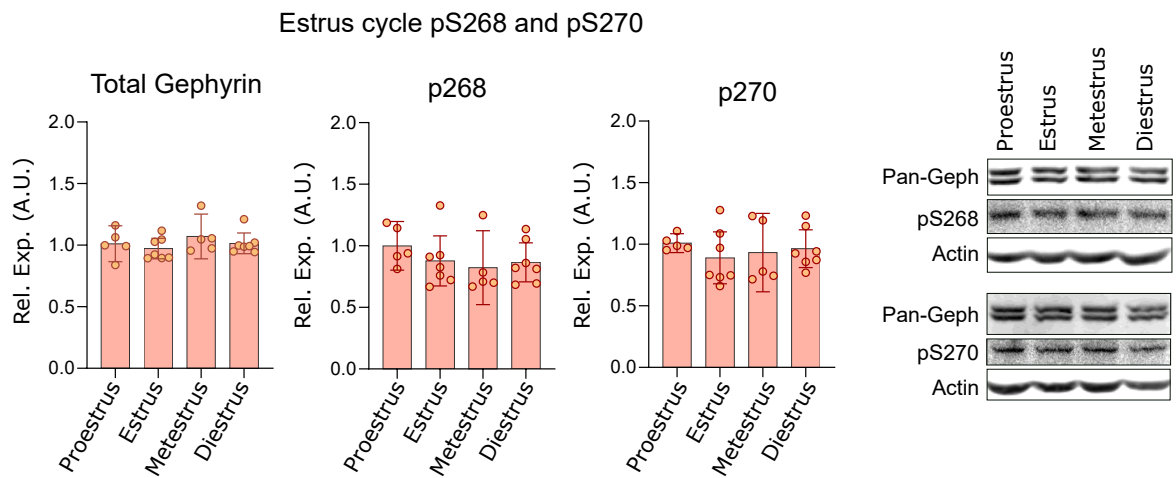**FIGURE 1 SUPPLEMENT**

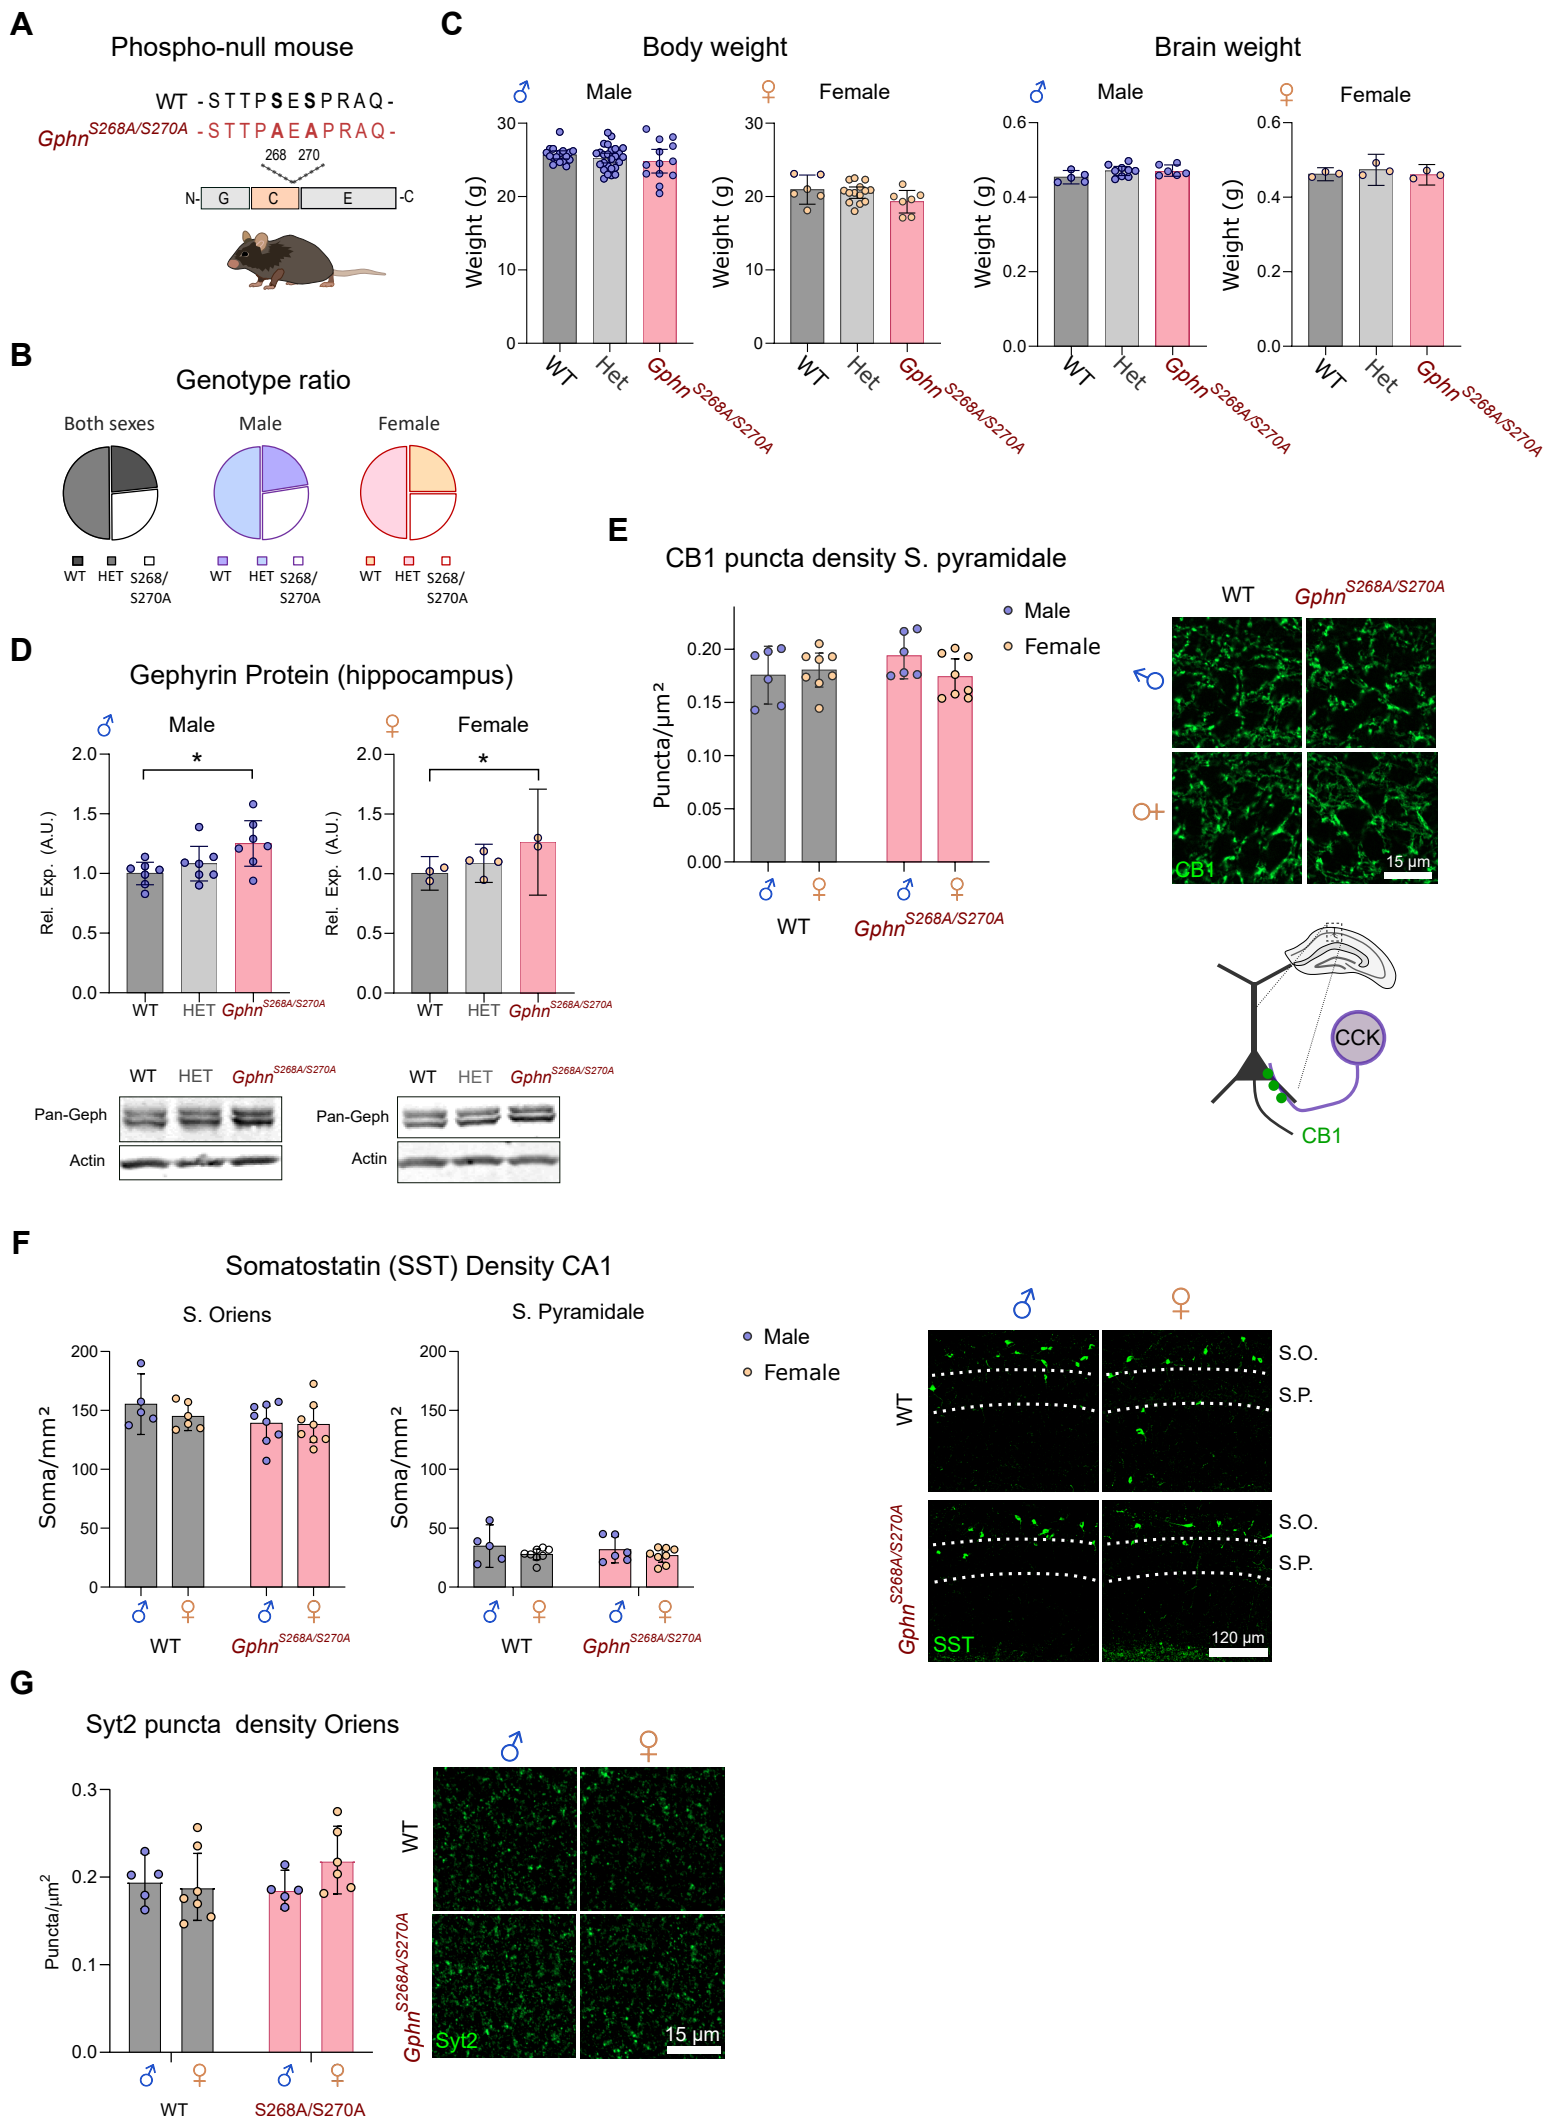

Figure 2 Supplement

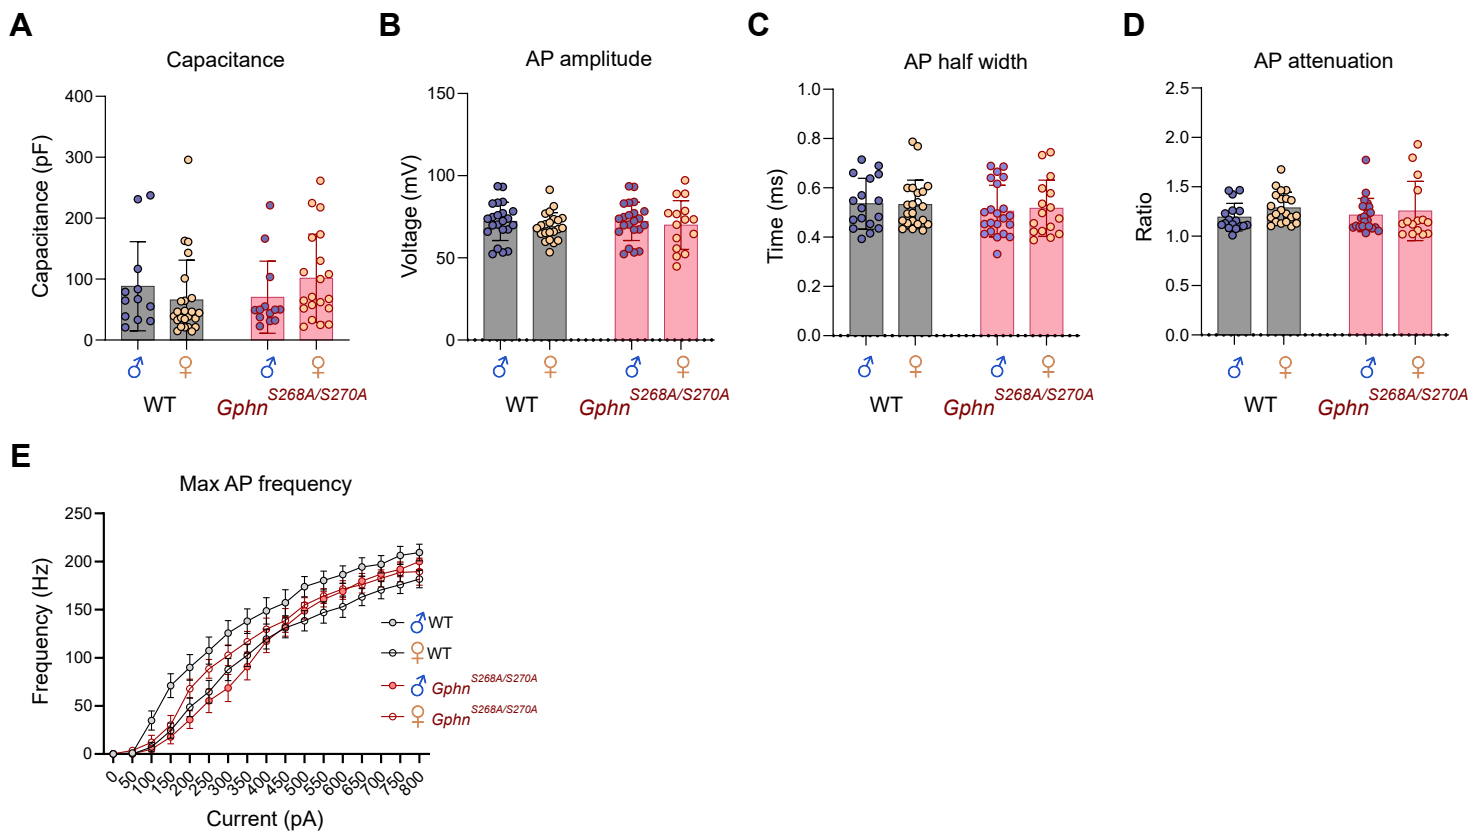

Figure 3 Supplement

**A**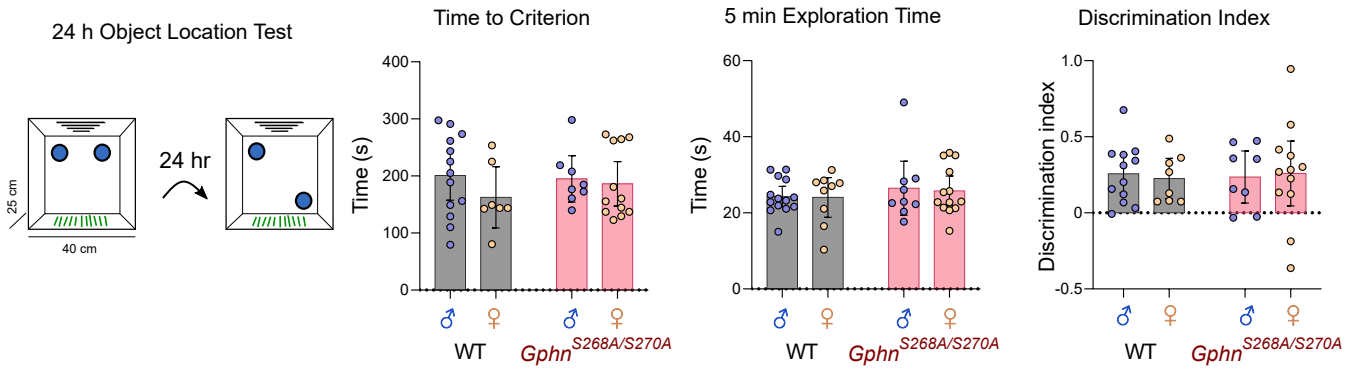**B**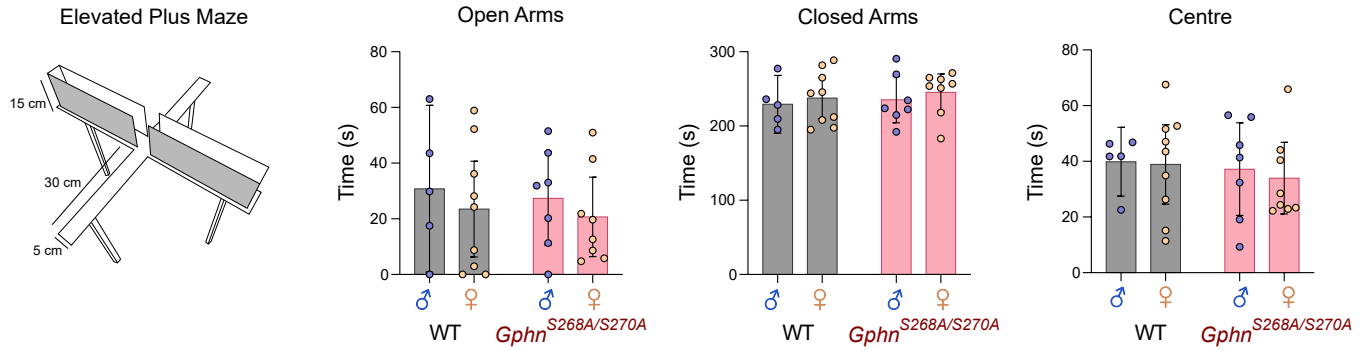**C**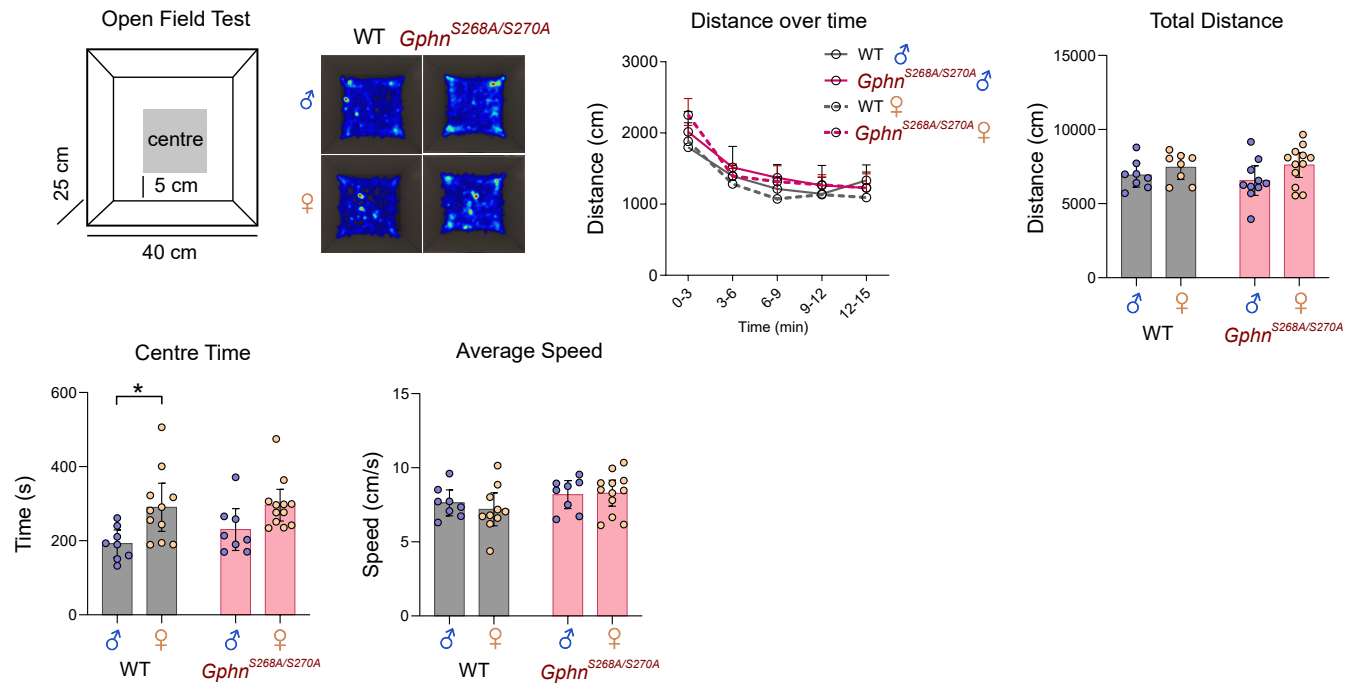**D**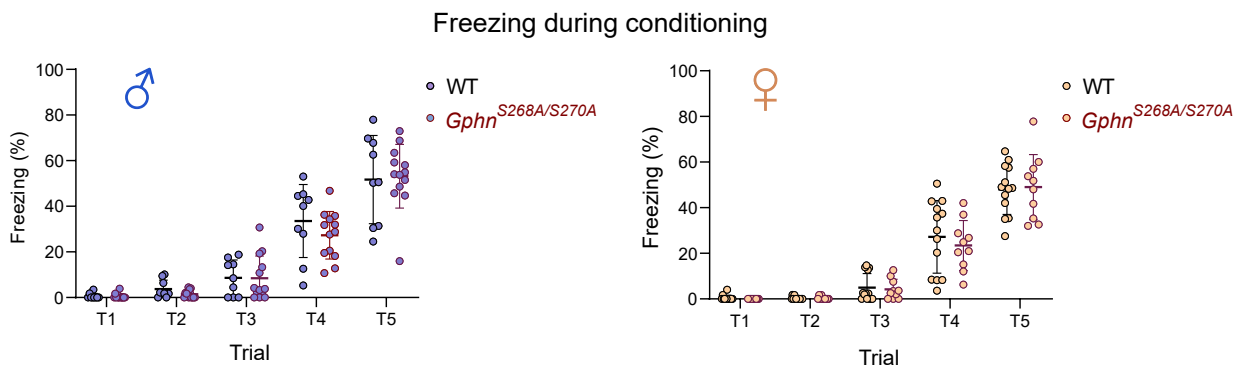**Figure 4 Supplement**

**A**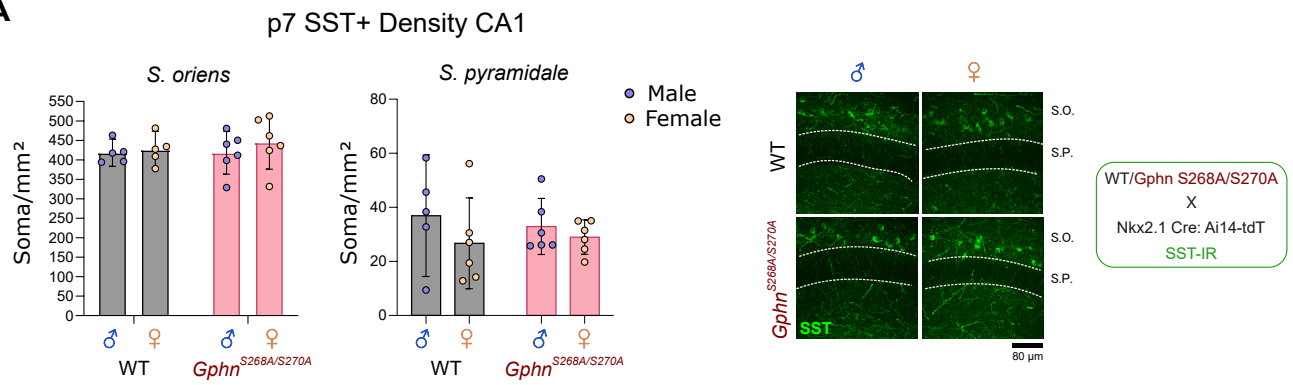**Figure 5 Supplement**



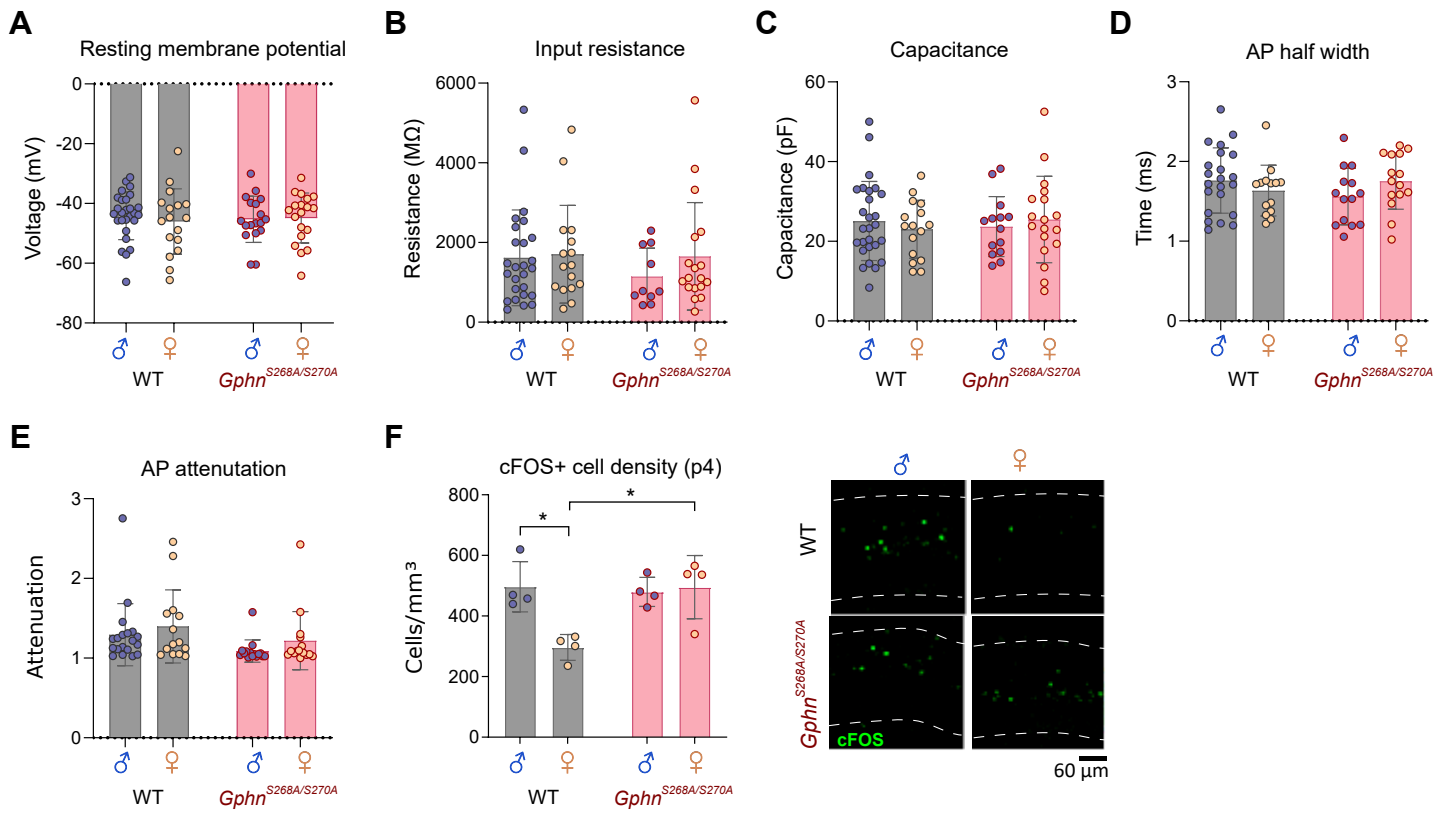

Figure 6 Supplement
